# Supplementary material
Source: PubMed Central journal article supplement (PMC9936300)
Supplement: BLOOD_BLD-2022-015966R1-mmc1.pdf [file BLOOD_BLD-2022-015966R1-mmc1.pdf]

### ***Response to therapy evaluation***

Response of immune cytopenia to sirolimus therapy is categorized as complete response (CR), partial response (PR) and no response (NR) based on previously published criteria<sup>1</sup>.

### ***Flow cytometry***

Immunophenotyping of peripheral blood mononuclear cells from patients with **m-IC** and HC was performed using flow cytometry. Fluorochrome conjugated monoclonal antibodies and live dead dye to exclude dead cells are listed in supplemental Table 3. Flow cytometry data was captured on BD FACSymphony™ A5 and analyzed by FlowJo software version 10. Description of cell populations used in this study were listed in supplemental Table 3. Total cTfh cells were defined as CD4<sup>+</sup> CD45RA<sup>-</sup> CXCR5<sup>+</sup> T cells. PD-1<sup>+</sup> cTfh or cTfh cell population was defined as CD4<sup>+</sup> CD45RA<sup>-</sup> CXCR5<sup>+</sup> PD-1<sup>+</sup>.

### ***Cytokine/chemokine profiling***

Plasma concentrations of soluble CD40 ligand (sCD40L), Interferon-gamma (IFN- $\gamma$ ), C-X-C motif chemokine ligand 9 (CXCL9), CXCL10, Interleukin-2 (IL-2), IL-7, IL-10, IL-18, IL-21 and IL-12p40 were determined using multi-analyte panel on Luminex platform.

### ***Statistical analysis***

Shapiro-Wilk test was used for testing the normality. When comparing more than two groups, one-way ANOVA with Tukey's multiple comparison tests was used for normally distributed data. For non-normal distribution, Kruskal-Wallis test with Dunn's multiple comparison test was used. Paired data was compared using paired t test or Wilcoxon signed rank test. GraphPad Prism v8 was used to perform statistical analysis.

## Supplement Figure legends

**Supplemental Figure 1. Timeline distribution of follow-up in patients with m-IC on sirolimus therapy.** Timeline plots represent the duration of follow-up from the start of sirolimus therapy. # represents a patient with poor adherence to sirolimus (<3 ng/mL).

**Supplemental Figure 2. Comparison of different immune parameters in patients with m-IC on sirolimus therapy.** (A-C) Percentage of HLA-DR<sup>+</sup> CD38<sup>+</sup>, PD-1<sup>+</sup> Tim3<sup>+</sup> and CD57<sup>+</sup> expression on CD8<sup>+</sup> EM T cells showing CD8<sup>+</sup>T cell activation, exhaustion, and senescence in HC and m-IC patients. (D-F) Data represent frequencies of Th1, Th2 and Th17 populations gated on CD4<sup>+</sup> T cells in HC and m-IC patients. (G-I) Dot plots showing frequencies of cTfh1, cTfh2 and cTfh17 gated on cTfh population in HC and m-IC patients. Dot plots represent ratios between proportion of Th1 and Th2 (J) and between cTfh1 and cTfh2 populations (K).

**Supplemental Figure 3. Comparison of immunoglobulin profiles and absolute number of lymphocytes in patients with m-IC on sirolimus therapy.** (A-C) Plots showing levels of immunoglobulins (IgA, IgG and IgM) in patients with m-IC (n = 10) before and after sirolimus therapy. (D-H) Plots showing absolute number of B cells, CD4<sup>+</sup> T, CD8<sup>+</sup> T, lymphocytes (ALC) and NK cells in patients with m-IC (n = 10) before and after sirolimus therapy.

**Supplemental Figure 4. Evaluation of sirolimus response on different immune subsets in patients with m-IC based on absence or presence of genetic mutations.** (A-E) Patients with m-IC were segregated based on presence (gene+) or absence (gene-) of pathogenic or likely pathogenic genetic variants. Plots showing percentage of cTfh, total cTfh, cTfh activation, exhaustion and senescence gated on CD45RA<sup>-</sup>CD4<sup>+</sup> T cells in m-IC sub-groups. (F-G) Plots showing percentage of CD4<sup>+</sup> and CD8<sup>+</sup> T cell activation gated on CD4<sup>+</sup> and CD8<sup>+</sup> effector memory T cells in m-IC sub-groups.

**Supplemental Figure 5. Longitudinal assessment of immune parameters in patients with m-IC on sirolimus therapy.** Data represents the longitudinal follow up of 2 patients with m-IC at two different time points based on frequencies of cTfh, CD4<sup>+</sup> T cell activation, CD<sup>+</sup> T naïve and CSMB populations.

**Supplemental Figure 6.** Visual abstract showing response to sirolimus therapy in patients with m-IC in terms of cytopenia, lymphoproliferation and immune-phenotypes.

## Reference

1. Bride KL, Vincent T, Smith-Whitley K, et al. Sirolimus is effective in relapsed/refractory autoimmune cytopenias: results of a prospective multi-institutional trial. *Blood*. 2016;127(1):17-28.

Supplemental Figure 1.

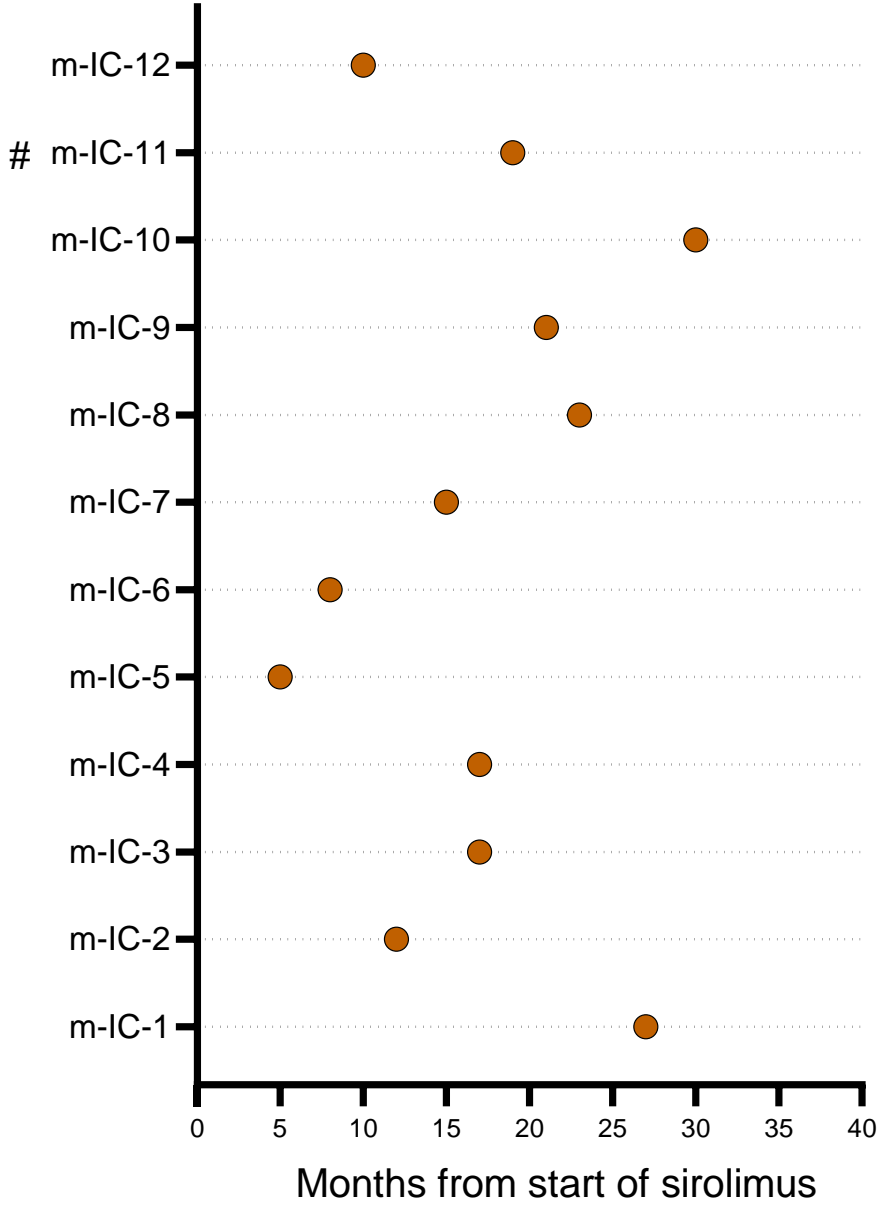

# Supplemental Figure 2.

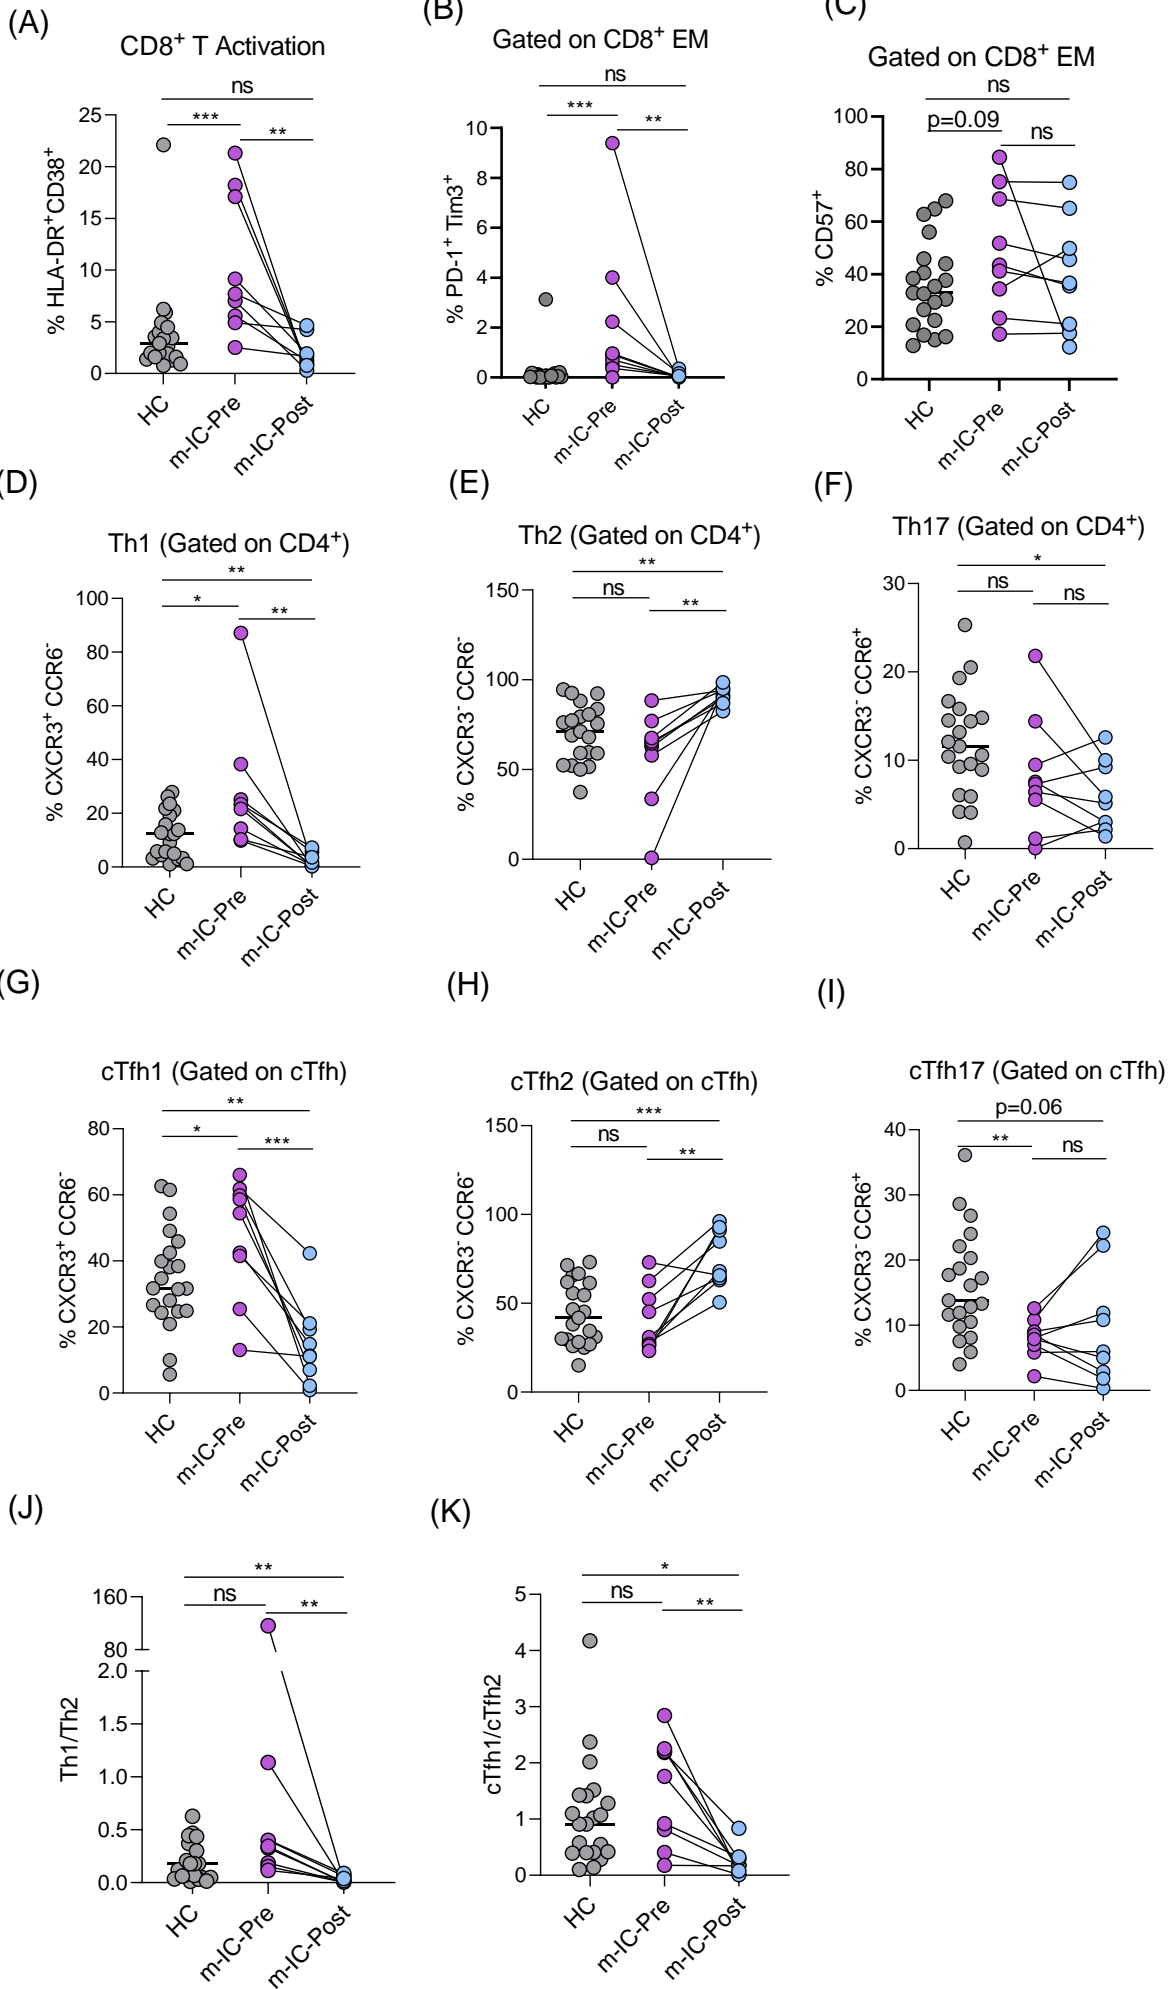

Supplemental Figure 3.

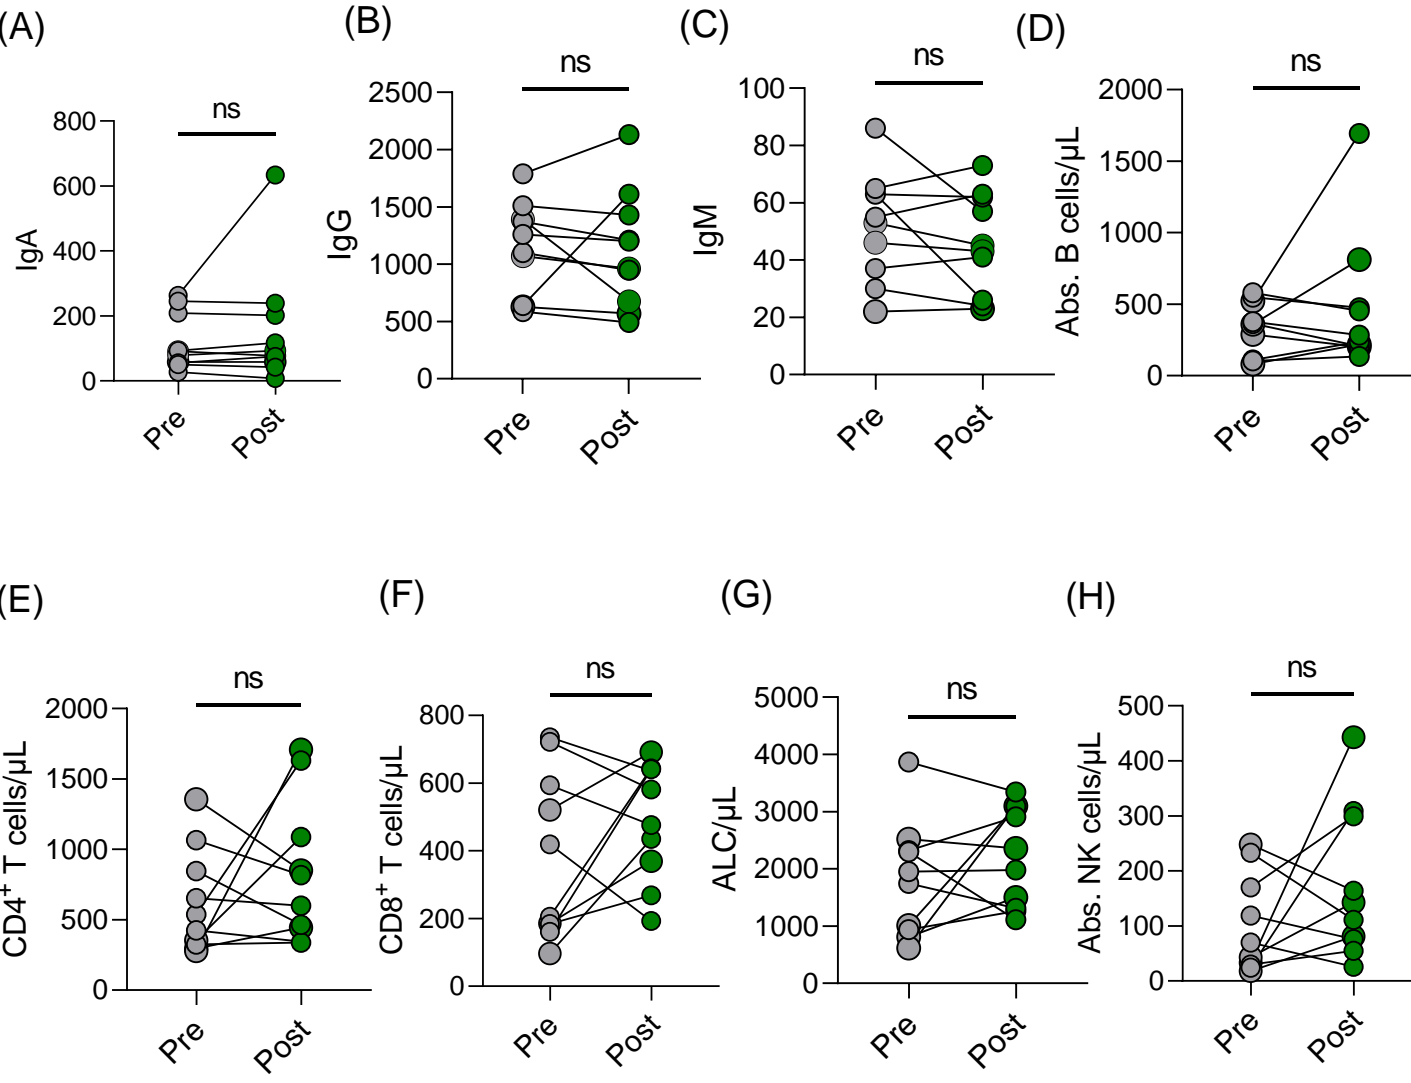

Supplemental Figure 4.

(A)

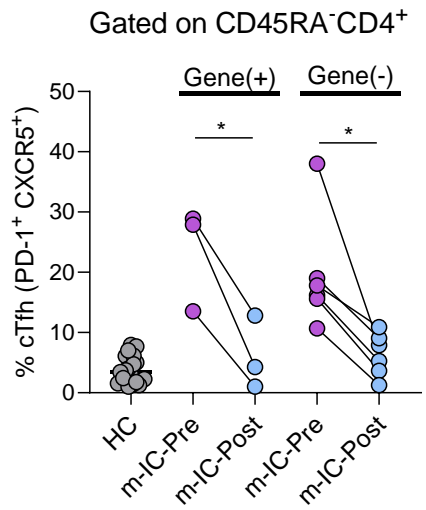

(B)

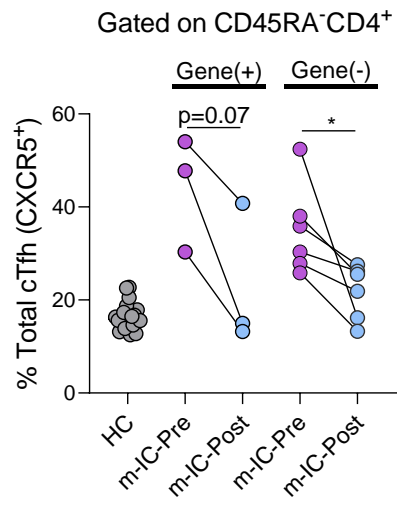

(C)

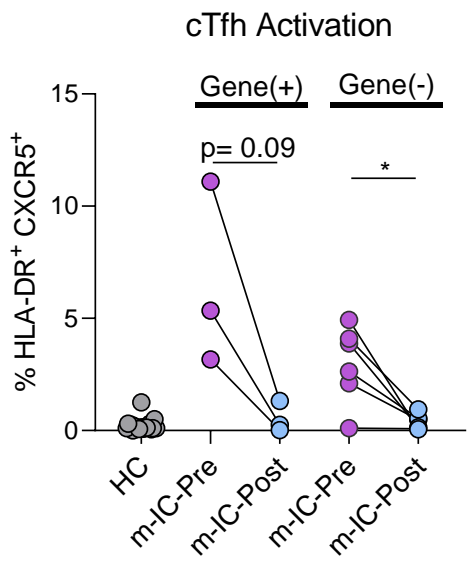

(D)

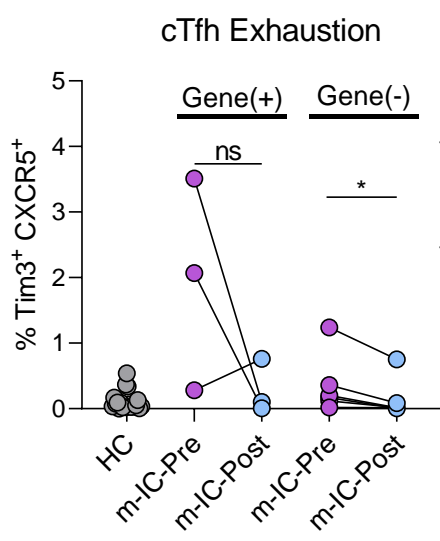

(E)

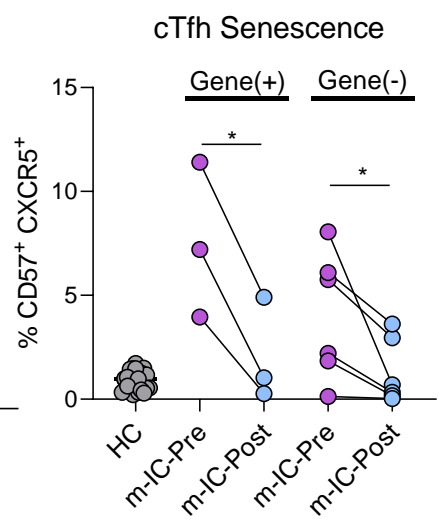

(F)

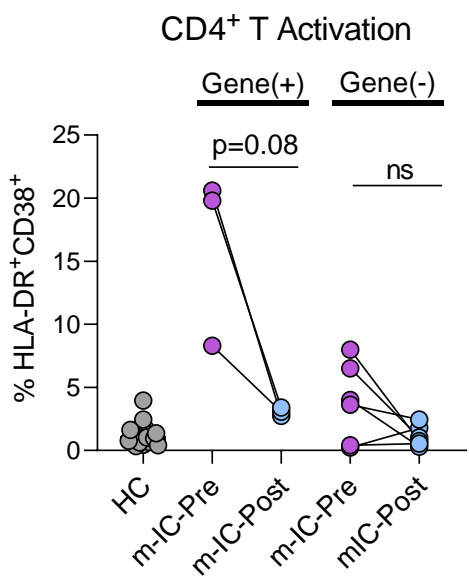

(G)

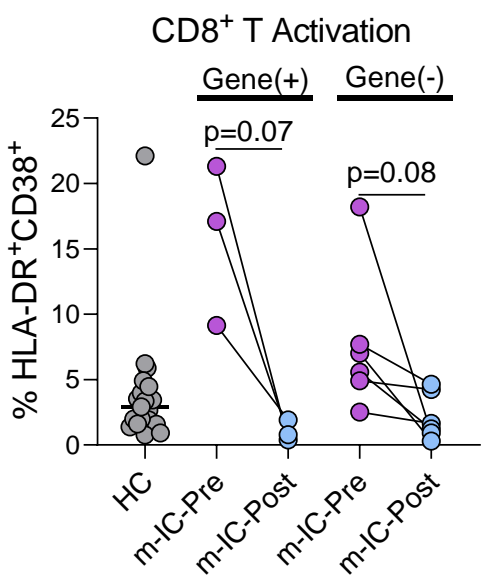

Supplemental Figure 5.

(A)

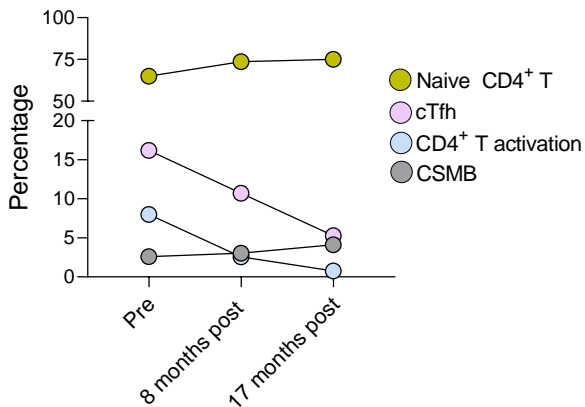

(B)

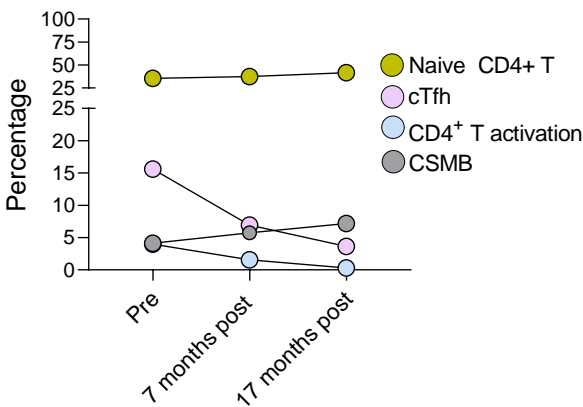



Supplemental Figure 6.

Multi-lineage immune cytopenias

Disease onset/Active disease

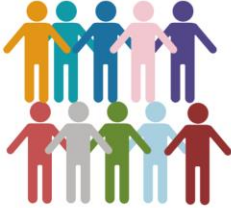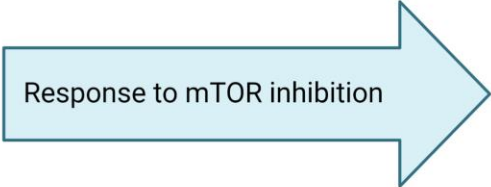

Multi-lineage immune cytopenias

Post mTOR inhibitor therapy

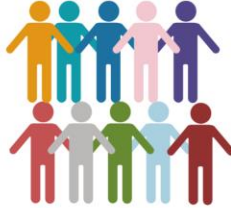

(+++)  
Immune cytopenia  
(+++)  
Lymphoproliferation

- ↑ cTfh
- ↑ cTfh activation, exhaustion and senescence
- ↑ T cell activation, exhaustion and senescence
- ↑ IFN-γ mediated inflammation
- ↑ Innate immune response
- ↓ Class switched memory B cells

(-)  
Immune cytopenia  
(+)  
Lymphoproliferation

- ↓ cTfh
- ↓ cTfh Activation, exhaustion and senescence
- ↓ T cell activation, exhaustion and senescence
- ↓ IFN-γ mediated inflammation
- ↓ Innate immune response
- ↓ Class switched memory B cells

Immune preservation  
Similar T, B and NK cells at pre and post sirolimus therapy

**Supplemental Table 1: Clinical characteristics and sirolimus response in patients with m-IC**

| ID | Clinical characteristics before sirolimus therapy |     |      |     |        |                 |                                                            | Sirolimus response                    |                  |                     |                               |                       |
|----|---------------------------------------------------|-----|------|-----|--------|-----------------|------------------------------------------------------------|---------------------------------------|------------------|---------------------|-------------------------------|-----------------------|
|    | Age(y)/sex                                        | ITP | AIHA | AIN | LAP/Sp | ANA (pattern)   | Vitamin B12 levels (pg/mL), Normal Range (180 - 914 pg/mL) | Sirolimus trough (ng/mL) on follow-up | Immune cytopenia | Lymphoproliferation | New autoimmune manifestations | Other adverse effects |
| 1  | 16/M                                              | +   | +    | +   | +      | <1:80           | 402 (Normal)                                               | 7.3                                   | CR               | Improved            | None                          | None                  |
| 2  | 18/F                                              | +   | -    | +   | +      | <1:80           | ND                                                         | 5                                     | CR               | Improved            | None                          | None                  |
| 3  | 5/F                                               | +   | +    | +   | -      | 1:80 (speckled) | ND                                                         | 9.4                                   | CR               | N/A                 | None                          | Mucositis             |
| 4  | 8/M                                               | +   | +    | +   | -      | <1:80           | ND                                                         | 10.1                                  | CR               | N/A                 | None                          | None                  |
| 5* | 15/M                                              | +   | -    | +   | +      | <1:80           | 453 (Normal)                                               | <2                                    | PR               | Persistent          | None                          | None                  |
| 6  | 7/F                                               | +   | +    | -   | +      | <1:80           | 924 (High)                                                 | 11.4                                  | CR               | Improved            | CNS inflammatory lesion       | None                  |
| 7  | 9/M                                               | +   | +    | +   | -      | 1:80 (speckled) | 830 (Normal)                                               | 5.4                                   | CR               | N/A                 | None                          | None                  |
| 8  | 13/M                                              | +   | +    | -   | +      | <1:80           | 365 (Normal)                                               | 9.9                                   | PR               | Improved            | None                          | None                  |
| 9  | 7/M                                               | +   | +    | -   | +      | <1:80           | >1500 (High)                                               | 3**                                   | CR               | Improved            | None                          | Mucositis             |
| 10 | 7/M                                               | +   | +    | -   | +      | <1:80           | ND                                                         | 5.3                                   | CR               | Improved            | None                          | None                  |
| 11 | 5/M                                               | +   | +    | -   | -      | <1:80           | 709 (Normal)                                               | 4.9                                   | CR               | N/A                 | None                          | None                  |
| 12 | 15/M                                              | +   | +    | -   | +      | <1:80           | 1388 (High)                                                | 4                                     | CR               | Improved            | None                          | Mucositis             |

AIHA-Autoimmune hemolytic anemia; AIN-autoimmune neutropenia; LAP/Sp- Lymphadenopathy or Splenomegaly, ANA -Antinuclear Antibody Test, CR-Complete response, PR-Partial response, N/A- Not applicable, ND- Not done.

\* Poor adherence to sirolimus with consistently undetectable levels

\*\* Due to poor tolerance to sirolimus, he was switched to everolimus, the level listed is for everolimus.

**Supplemental Table 2: Genetic characteristics of patients with m-IC.**

| Patient | Variant/s                                                    | Protein level mutation       | Classification                 | Zygoty                              | OMIM                      |
|---------|--------------------------------------------------------------|------------------------------|--------------------------------|-------------------------------------|---------------------------|
| 1       | <i>PNP</i> whole gene dup<br>.....<br><i>PRKCB</i> c.1763c>A | N/A<br>.....<br>p. Pro588His | VUS<br>.....<br>VUS            | Homozygous<br>.....<br>Heterozygous | 164050<br>.....<br>176970 |
| 2       | <i>CFHR3</i> gene deletion                                   | N/A                          | Risk allele                    | Homozygous                          | 605336                    |
| 3       | WES negative                                                 | N/A                          | N/A                            | N/A                                 | N/A                       |
| 4       | <i>ADA</i> , Exon 6, c.529G>A                                | p. Val177Met                 | VUS                            | Heterozygous                        | 608958                    |
| 5       | WES negative                                                 | N/A                          | N/A                            | N/A                                 | N/A                       |
| 6       | <i>LRBA</i> c.893del                                         | p. Lys298Serfs*7             | Pathogenic                     | Homozygous                          | 606453                    |
| 7       | WES negative                                                 | N/A                          | N/A                            | N/A                                 | N/A                       |
| 8       | WES negative                                                 | N/A                          | N/A                            | N/A                                 | N/A                       |
| 9       | <i>FAS</i> c.536T>G                                          | p. Leu179Arg                 | Likely pathogenic#             | Heterozygous                        | 134637                    |
| 10      | <i>PIK3CD</i> c.1574A>G                                      | p. Glu525Gly                 | Likely Pathogenic <sup>1</sup> | Heterozygous                        | 602839                    |
| 11      | WES negative                                                 | N/A                          | N/A                            | N/A                                 | N/A                       |
| 12      | <i>FAS</i> c.386G>A                                          | p. Cys129Tyr                 | Likely pathogenic              | Heterozygous                        | 134637                    |

VUS- Variant of uncertain significance, N/A- Not applicable, OMIM- Online Mendelian Inheritance in Man,

# <https://www.ncbi.nlm.nih.gov/clinvar/RCV000626571.1/>

Reference: -

1. Zhang X, Wang J, Zhu K, Jin Y, Fu H, Mao J. Activated phosphoinositide 3-kinase delta syndrome misdiagnosed as anti-neutrophil cytoplasmic antibody-associated vasculitis: a case report. *J Int Med Res.* 2021;49(5):3000605211013222.

**Supplemental Table 3.** Reagents used for flow cytometry.

| <b>Reagent</b>                          | <b>Cat. No.</b> | <b>Source</b>  |
|-----------------------------------------|-----------------|----------------|
| <b>Antibodies (Clone)</b>               |                 |                |
| PerCP/Cy5.5-anti-CD3 (UCHT1)            | 300430          | Biolegend      |
| PE-Cy7-anti-CD4 (RPA-T4)                | 560649          | BD Biosciences |
| BUV395-anti-CD8 (RPA-T8)                | 563795          | BD Biosciences |
| PE-anti-CCR7 (G043H7)                   | 353204          | Biolegend      |
| APC-anti-CD45RA (HI100)                 | 304112          | Biolegend      |
| BV711-anti-HLA-DR (G46-6)               | 563696          | BD Biosciences |
| BUV496-anti-CD38 (HIT2)                 | 612947          | BD Biosciences |
| BV605-anti-CXCR5 (J252D4)               | 356930          | Biolegend      |
| BV421-anti-PD-1 (EH12.1)                | 562516          | BD Biosciences |
| BB515-anti-CD57 (NK-1)                  | 565285          | BD Biosciences |
| APC-Cy7-anti-CXCR3 (G025H7)             | 353722          | Biolegend      |
| BUV737-anti-CCR6 (11A9)                 | 612780          | BD Biosciences |
| BV650-anti-TIM-3 (F38-2E2)              | 345028          | Biolegend      |
| BUV496-anti-CD19 (SJ25C1)               | 612938          | BD Biosciences |
| APC-Cy7-anti-CD27 (O323)                | 302816          | Biolegend      |
| PE-anti-IgM (MHM-88)                    | 314508          | Biolegend      |
| BV421-anti-IgD (IA6-2)                  | 348226          | Biolegend      |
| <b>Chemicals</b>                        |                 |                |
| LIVE/DEAD™ Fixable Aqua Dead Cell Stain | L34966          | Thermofisher   |

**Supplemental Table 4. Definitions of T and B cell populations used in this study**

| Population                              | Markers                                                                                                        | References |
|-----------------------------------------|----------------------------------------------------------------------------------------------------------------|------------|
| <b>T cells</b>                          |                                                                                                                |            |
| PD-1 <sup>+</sup> cTfh/ cTfh            | CD4 <sup>+</sup> CD45RA <sup>-</sup> CXCR5 <sup>+</sup> PD-1 <sup>+</sup>                                      | 1-4        |
| Total cTfh                              | CD4 <sup>+</sup> CD45RA <sup>-</sup> CXCR5 <sup>+</sup>                                                        | 1-4        |
| cTfh1                                   | CD4 <sup>+</sup> CD45RA <sup>-</sup> CXCR5 <sup>+</sup> PD-1 <sup>+</sup> CXCR3 <sup>+</sup> CCR6 <sup>-</sup> | 5,6        |
| cTfh2                                   | CD4 <sup>+</sup> CD45RA <sup>-</sup> CXCR5 <sup>+</sup> PD-1 <sup>+</sup> CXCR3 <sup>-</sup> CCR6 <sup>-</sup> | 5,6        |
| cTfh17                                  | CD4 <sup>+</sup> CD45RA <sup>-</sup> CXCR5 <sup>+</sup> PD-1 <sup>+</sup> CXCR3 <sup>-</sup> CCR6 <sup>+</sup> | 5,6        |
| Th1                                     | CD4 <sup>+</sup> CXCR3 <sup>+</sup> CCR6 <sup>-</sup>                                                          | 7          |
| Th2                                     | CD4 <sup>+</sup> CXCR3 <sup>-</sup> CCR6 <sup>-</sup>                                                          | 7          |
| Th17                                    | CD4 <sup>+</sup> CXCR3 <sup>-</sup> CCR6 <sup>+</sup>                                                          | 7          |
| Naïve CD4 <sup>+</sup> T                | CD4 <sup>+</sup> CCR7 <sup>+</sup> CD45RA <sup>+</sup>                                                         | 7          |
| Effector memory (EM) CD4 <sup>+</sup> T | CD4 <sup>+</sup> CCR7 <sup>-</sup> CD45RA <sup>-</sup>                                                         | 7          |
| TEMRA CD4 <sup>+</sup> T                | CD4 <sup>+</sup> CCR7 <sup>-</sup> CD45RA <sup>+</sup>                                                         | 7          |
| Effector memory CD8 <sup>+</sup> T      | CD8 <sup>+</sup> CCR7 <sup>-</sup> CD45RA <sup>-</sup>                                                         | 7          |
| Activated CD4 <sup>+</sup> T            | CD4 <sup>+</sup> CD45RA <sup>-</sup> CCR7 <sup>-</sup> HLA-DR <sup>+</sup> CD38 <sup>+</sup>                   | 8-10       |
| Activated CD8 <sup>+</sup> T            | CD8 <sup>+</sup> CD45RA <sup>-</sup> CCR7 <sup>-</sup> HLA-DR <sup>+</sup> CD38 <sup>+</sup>                   | 8-10       |
| Senescent CD4 <sup>+</sup> T            | CD4 <sup>+</sup> CD45RA <sup>-</sup> CCR7 <sup>-</sup> CD57 <sup>+</sup>                                       | 11-14      |
| Senescent CD8 <sup>+</sup> T            | CD8 <sup>+</sup> CD45RA <sup>-</sup> CCR7 <sup>-</sup> CD57 <sup>+</sup>                                       | 11-14      |
| Exhausted CD4 <sup>+</sup>              | CD4 <sup>+</sup> CD45RA <sup>-</sup> CCR7 <sup>-</sup> PD-1 <sup>+</sup> Tim3 <sup>+</sup>                     | 15         |
| Exhausted CD8 <sup>+</sup>              | CD8 <sup>+</sup> CD45RA <sup>-</sup> CCR7 <sup>-</sup> PD-1 <sup>+</sup> Tim3 <sup>+</sup>                     | 15         |
| <b>B cells</b>                          |                                                                                                                |            |
| Class-switched memory B (CSMB)          | CD19 <sup>+</sup> CD27 <sup>+</sup> IgM <sup>-</sup> IgD <sup>-</sup>                                          | 16         |

## References

1. Craft JE. Follicular helper T cells in immunity and systemic autoimmunity. *Nat Rev Rheumatol*. 2012;8(6):337-347.
2. Forcade E, Kim HT, Cutler C, et al. Circulating T follicular helper cells with increased function during chronic graft-versus-host disease. *Blood*. 2016;127(20):2489-2497.
3. Alroqi FJ, Charbonnier LM, Baris S, et al. Exaggerated follicular helper T-cell responses in patients with LRBA deficiency caused by failure of CTLA4-mediated regulation. *J Allergy Clin Immunol*. 2018;141(3):1050-1059.e1010.
4. Gensous N, Charrier M, Duluc D, et al. T Follicular Helper Cells in Autoimmune Disorders. *Front Immunol*. 2018;9:1637.
5. Unger S, Seidl M, van Schouwenburg P, et al. The T(H)1 phenotype of follicular helper T cells indicates an IFN- $\gamma$ -associated immune dysregulation in patients with CD21<sup>low</sup> common variable immunodeficiency. *J Allergy Clin Immunol*. 2018;141(2):730-740.
6. Xu M, Jiang Y, Wang J, et al. Distribution of distinct subsets of circulating T follicular helper cells in Kawasaki disease. *BMC Pediatr*. 2019;19(1):43.
7. Maecker HT, McCoy JP, Nussenblatt R. Standardizing immunophenotyping for the Human Immunology Project. *Nat Rev Immunol*. 2012;12(3):191-200.
8. Khandelwal P, Lane A, Chaturvedi V, et al. Peripheral Blood CD38 Bright CD8<sup>+</sup> Effector Memory T Cells Predict Acute Graft-versus-Host Disease. *Biol Blood Marrow Transplant*. 2015;21(7):1215-1222.
9. Khandelwal P, Chaturvedi V, Owsley E, et al. CD38(bright)CD8(+) T Cells Associated with the Development of Acute GVHD Are Activated, Proliferating, and Cytotoxic Trafficking Cells. *Biol Blood Marrow Transplant*. 2020;26(1):1-6.

10. Chaturvedi V, Marsh RA, Lorenz AZ, et al. T cell activation profiles distinguish hemophagocytic lymphohistiocytosis and early sepsis. *Blood*. 2020.
11. Focosi D, Bestagno M, Burrone O, Petrini M. CD57+ T lymphocytes and functional immune deficiency. *J Leukoc Biol*. 2010;87(1):107-116.
12. Cura Daball P, Ventura Ferreira MS, Ammann S, et al. CD57 identifies T cells with functional senescence before terminal differentiation and relative telomere shortening in patients with activated PI3 kinase delta syndrome. *Immunol Cell Biol*. 2018;96(10):1060-1071.
13. Brenchley JM, Karandikar NJ, Betts MR, et al. Expression of CD57 defines replicative senescence and antigen-induced apoptotic death of CD8+ T cells. *Blood*. 2003;101(7):2711-2720.
14. Lopez-Vergès S, Milush JM, Pandey S, et al. CD57 defines a functionally distinct population of mature NK cells in the human CD56dimCD16+ NK-cell subset. *Blood*. 2010;116(19):3865-3874.
15. Anderson AC, Joller N, Kuchroo VK. Lag-3, Tim-3, and TIGIT: Co-inhibitory Receptors with Specialized Functions in Immune Regulation. *Immunity*. 2016;44(5):989-1004.
16. Warnatz K, Denz A, Dräger R, et al. Severe deficiency of switched memory B cells (CD27(+)/IgM(-)/IgD(-)) in subgroups of patients with common variable immunodeficiency: a new approach to classify a heterogeneous disease. *Blood*. 2002;99(5):1544-1551.
